# Supplementary material
Source: PubMed Central journal article supplement (PMC5837339)
Supplement: brain-2016-01452-file010_awx293.pdf [file brain-2016-01452-file010_awx293.pdf]

**Supplementary Table 1: Annualized rates of change in fractional anisotropy across regions-of-interest**

| ROI                                  | Hem | Control        | agPPA          | PPAOS          | agPPA~Control   | PPAOS~Control   | agPPA~PPAOS     |
|--------------------------------------|-----|----------------|----------------|----------------|-----------------|-----------------|-----------------|
|                                      |     |                |                |                | AUROC (p)       | AUROC (p)       | AUROC (p)       |
| Inferior Frontal White Matter        | L   | -0.005 (0.012) | -0.038 (0.027) | -0.013 (0.014) | 0.9 (p=0.001)   | 0.707 (p=0.083) | 0.768 (p=0.185) |
|                                      | R   | -0.004 (0.015) | -0.032 (0.02)  | -0.012 (0.012) | 0.881 (p=0.001) | 0.726 (p=0.063) | 0.8 (p=0.185)   |
| Inferior Fronto-occipital Fasciculus | L   | -0.002 (0.028) | -0.019 (0.023) | -0.008 (0.016) | 0.734 (p=0.073) | 0.59 (p=0.526)  | 0.641 (p=0.547) |
|                                      | R   | 0.005 (0.021)  | -0.031 (0.031) | -0.008 (0.019) | 0.887 (p=0.001) | 0.698 (p=0.091) | 0.777 (p=0.185) |
| Middle Frontal white matter          | L   | -0.007 (0.014) | -0.033 (0.022) | -0.02 (0.018)  | 0.862 (p=0.002) | 0.709 (p=0.083) | 0.686 (p=0.503) |
|                                      | R   | -0.001 (0.011) | -0.027 (0.016) | -0.009 (0.019) | 0.928 (p<0.001) | 0.686 (p=0.098) | 0.768 (p=0.185) |
| Middle Fronto-orbital white matter   | L   | -0.005 (0.026) | -0.018 (0.042) | -0.006 (0.014) | 0.592 (p=0.523) | 0.534 (p=0.818) | 0.555 (p=0.848) |
|                                      | R   | 0.004 (0.023)  | -0.022 (0.043) | 0.006 (0.027)  | 0.712 (p=0.109) | 0.534 (p=0.818) | 0.686 (p=0.503) |
| Superior Frontal white matter        | L   | -0.002 (0.011) | -0.012 (0.02)  | -0.005 (0.013) | 0.737 (p=0.071) | 0.557 (p=0.732) | 0.659 (p=0.547) |
|                                      | R   | -0 (0.011)     | -0.013 (0.021) | -0.005 (0.011) | 0.765 (p=0.038) | 0.634 (p=0.306) | 0.695 (p=0.503) |
| Superior Fronto-occipital Fasciculus | L   | 0.006 (0.044)  | 0.006 (0.04)   | 0 (0.041)      | 0.517 (p=0.934) | 0.559 (p=0.732) | 0.527 (p=0.949) |
|                                      | R   | -0.002 (0.038) | 0.026 (0.042)  | 0.003 (0.042)  | 0.671 (p=0.217) | 0.553 (p=0.732) | 0.645 (p=0.547) |
| Superior Longitudinal Fasciculus     | L   | -0 (0.014)     | -0.021 (0.019) | -0.019 (0.015) | 0.803 (p=0.018) | 0.833 (p=0.001) | 0.5 (p=1)       |
|                                      | R   | 0.002 (0.01)   | -0.018 (0.017) | -0.01 (0.026)  | 0.859 (p=0.002) | 0.784 (p=0.007) | 0.586 (p=0.797) |
| Lateral Fronto-orbital white matter  | L   | -0.012 (0.043) | -0.035 (0.047) | -0.009 (0.032) | 0.705 (p=0.115) | 0.605 (p=0.449) | 0.655 (p=0.547) |
|                                      | R   | -0.003 (0.03)  | -0.006 (0.035) | 0 (0.028)      | 0.583 (p=0.579) | 0.524 (p=0.85)  | 0.536 (p=0.949) |
| Cingulum                             | L   | 0 (0.015)      | -0.008 (0.029) | -0.008 (0.028) | 0.655 (p=0.255) | 0.626 (p=0.341) | 0.518 (p=0.974) |
|                                      | R   | 0 (0.021)      | -0.024 (0.022) | -0.009 (0.022) | 0.799 (p=0.018) | 0.591 (p=0.526) | 0.677 (p=0.544) |
| Body of Corpus Callosum              |     | 0.001 (0.018)  | 0.014 (0.042)  | 0.001 (0.04)   | 0.527 (p=0.903) | 0.614 (p=0.406) | 0.645 (p=0.547) |
| Genu of Corpus Callosum              |     | -0.001 (0.01)  | -0.004 (0.022) | -0.002 (0.016) | 0.561 (p=0.737) | 0.536 (p=0.818) | 0.545 (p=0.904) |
| Splenium of Corpus Callosum          |     | 0.002 (0.007)  | -0.001 (0.033) | -0.004 (0.018) | 0.687 (p=0.163) | 0.676 (p=0.119) | 0.527 (p=0.949) |
| Precentral                           | L   | 0.002 (0.009)  | -0.017 (0.035) | -0.017 (0.014) | 0.655 (p=0.255) | 0.895 (p<0.001) | 0.668 (p=0.547) |
|                                      | R   | -0.002 (0.009) | -0.016 (0.017) | -0.017 (0.015) | 0.784 (p=0.023) | 0.803 (p=0.004) | 0.532 (p=0.949) |
| Postcentral                          | L   | -0 (0.011)     | 0.001 (0.024)  | -0.007 (0.015) | 0.549 (p=0.806) | 0.631 (p=0.316) | 0.659 (p=0.547) |
|                                      | R   | -0.001 (0.01)  | -0.004 (0.017) | -0.004 (0.015) | 0.505 (p=0.976) | 0.595 (p=0.512) | 0.5 (p=1)       |
| Corticospinal Tract                  | L   | 0.006 (0.024)  | -0.02 (0.037)  | -0.013 (0.026) | 0.796 (p=0.018) | 0.695 (p=0.093) | 0.645 (p=0.547) |
|                                      | R   | 0.005 (0.027)  | -0.005 (0.054) | -0.012 (0.025) | 0.687 (p=0.163) | 0.676 (p=0.119) | 0.555 (p=0.848) |
| Temporal                             | L   | -0.002 (0.003) | -0.005 (0.006) | -0.004 (0.005) | 0.727 (p=0.077) | 0.569 (p=0.663) | 0.595 (p=0.792) |

|                                    |   |                |                |                |                 |                 |                 |
|------------------------------------|---|----------------|----------------|----------------|-----------------|-----------------|-----------------|
|                                    | R | -0.003 (0.004) | -0.006 (0.009) | -0.003 (0.007) | 0.592 (p=0.523) | 0.524 (p=0.85)  | 0.568 (p=0.848) |
| Parietal                           | L | -0.001 (0.005) | -0.005 (0.011) | -0.005 (0.008) | 0.633 (p=0.342) | 0.691 (p=0.096) | 0.514 (p=0.974) |
|                                    | R | -0.001 (0.003) | -0.006 (0.01)  | -0.006 (0.007) | 0.639 (p=0.328) | 0.75 (p=0.029)  | 0.555 (p=0.848) |
| Occipital                          | L | -0.003 (0.006) | -0.002 (0.009) | -0.004 (0.007) | 0.524 (p=0.903) | 0.553 (p=0.732) | 0.555 (p=0.848) |
|                                    | R | -0.003 (0.007) | -0.006 (0.006) | -0.004 (0.006) | 0.614 (p=0.424) | 0.502 (p=0.992) | 0.586 (p=0.797) |
| Uncinate Fasciculus                | L | -0.015 (0.034) | -0.031 (0.035) | -0.018 (0.04)  | 0.655 (p=0.255) | 0.512 (p=0.931) | 0.614 (p=0.672) |
|                                    | R | 0.021 (0.051)  | -0.027 (0.047) | -0.015 (0.061) | 0.727 (p=0.077) | 0.662 (p=0.167) | 0.555 (p=0.848) |
| Posterior Thalamic Radiation       | L | 0.003 (0.012)  | 0.004 (0.022)  | -0.002 (0.02)  | 0.511 (p=0.965) | 0.576 (p=0.628) | 0.564 (p=0.848) |
|                                    | R | 0 (0.011)      | -0.002 (0.021) | 0.003 (0.029)  | 0.608 (p=0.453) | 0.548 (p=0.749) | 0.564 (p=0.848) |
| Superior Cerebellar Peduncle       | L | 0.001 (0.016)  | -0.019 (0.013) | -0.002 (0.023) | 0.856 (p=0.002) | 0.574 (p=0.628) | 0.736 (p=0.338) |
|                                    | R | -0.001 (0.018) | 0 (0.017)      | -0.008 (0.014) | 0.549 (p=0.806) | 0.603 (p=0.449) | 0.645 (p=0.547) |
| Anterior Limb of Internal Capsule  | L | -0.001 (0.024) | -0.001 (0.042) | 0.003 (0.031)  | 0.53 (p=0.903)  | 0.543 (p=0.784) | 0.514 (p=0.974) |
|                                    | R | -0.005 (0.026) | 0.017 (0.036)  | 0 (0.039)      | 0.658 (p=0.255) | 0.566 (p=0.68)  | 0.605 (p=0.731) |
| Posterior Limb of Internal Capsule | L | -0.001 (0.014) | -0.008 (0.024) | -0.009 (0.016) | 0.624 (p=0.376) | 0.643 (p=0.261) | 0.532 (p=0.949) |
|                                    | R | 0.001 (0.014)  | -0.002 (0.021) | -0.008 (0.024) | 0.527 (p=0.903) | 0.698 (p=0.091) | 0.627 (p=0.601) |
| External Capsule                   | L | -0.006 (0.018) | -0.025 (0.016) | -0.019 (0.022) | 0.793 (p=0.018) | 0.719 (p=0.069) | 0.636 (p=0.547) |
|                                    | R | -0.001 (0.02)  | -0.024 (0.026) | -0.011 (0.017) | 0.752 (p=0.052) | 0.686 (p=0.098) | 0.636 (p=0.547) |

Results are shown as Median (interquartile range). Declines in FA over time are represented as negative values. All p values are corrected using the false discovery rate

**Supplementary Table 2: Annualized rates of change in mean diffusivity across regions-of-interest**

| ROI                                  | He<br>m | Control        | agPPA          | PPAOS          | agPPA~Control<br>AUROC (p) | PPAOS~Control<br>AUROC (p) | agPPA~PPAOS<br>AUROC (p) |
|--------------------------------------|---------|----------------|----------------|----------------|----------------------------|----------------------------|--------------------------|
| Inferior Frontal White Matter        | L       | 0.003 (0.014)  | 0.031 (0.024)  | 0.008 (0.015)  | 0.85 (p=0.004)             | 0.607 (p=0.355)            | 0.768 (p=0.154)          |
|                                      | R       | 0 (0.016)      | 0.025 (0.019)  | 0.008 (0.011)  | 0.9 (p=0.001)              | 0.698 (p=0.086)            | 0.8 (p=0.086)            |
| Inferior Fronto-occipital Fasciculus | L       | 0.001 (0.011)  | 0.026 (0.034)  | 0.006 (0.01)   | 0.752 (p=0.058)            | 0.65 (p=0.196)             | 0.586 (p=0.906)          |
|                                      | R       | -0.003 (0.014) | 0.025 (0.048)  | 0.005 (0.015)  | 0.727 (p=0.076)            | 0.659 (p=0.171)            | 0.618 (p=0.906)          |
| Middle Frontal white matter          | L       | 0.008 (0.012)  | 0.038 (0.026)  | 0.013 (0.016)  | 0.84 (p=0.005)             | 0.591 (p=0.441)            | 0.795 (p=0.086)          |
|                                      | R       | 0.007 (0.018)  | 0.025 (0.017)  | 0.014 (0.014)  | 0.784 (p=0.028)            | 0.674 (p=0.13)             | 0.709 (p=0.468)          |
| Middle Fronto-orbital white matter   | L       | 0.001 (0.024)  | 0.015 (0.058)  | 0.01 (0.023)   | 0.514 (p=0.939)            | 0.538 (p=0.703)            | 0.536 (p=0.906)          |
|                                      | R       | -0.005 (0.019) | 0.002 (0.035)  | -0.008 (0.037) | 0.705 (p=0.094)            | 0.553 (p=0.604)            | 0.582 (p=0.906)          |
| Superior Frontal white matter        | L       | 0.003 (0.012)  | 0.019 (0.023)  | 0.008 (0.015)  | 0.752 (p=0.058)            | 0.648 (p=0.196)            | 0.655 (p=0.776)          |
|                                      | R       | 0.002 (0.01)   | 0.019 (0.016)  | 0.01 (0.014)   | 0.862 (p=0.002)            | 0.702 (p=0.084)            | 0.682 (p=0.712)          |
| Superior Fronto-occipital Fasciculus | L       | 0.008 (0.026)  | 0.043 (0.036)  | 0.025 (0.026)  | 0.734 (p=0.071)            | 0.636 (p=0.234)            | 0.605 (p=0.906)          |
|                                      | R       | 0.002 (0.032)  | 0.016 (0.059)  | 0.012 (0.038)  | 0.658 (p=0.212)            | 0.591 (p=0.441)            | 0.595 (p=0.906)          |
| Superior Longitudinal Fasciculus     | L       | 0 (0.009)      | 0.013 (0.017)  | 0.013 (0.013)  | 0.734 (p=0.071)            | 0.802 (p=0.003)            | 0.518 (p=0.938)          |
|                                      | R       | 0.002 (0.008)  | 0.015 (0.018)  | 0.011 (0.011)  | 0.743 (p=0.071)            | 0.741 (p=0.03)             | 0.555 (p=0.906)          |
| Lateral Fronto-orbital white matter  | L       | -0.002 (0.027) | 0.026 (0.033)  | 0.012 (0.028)  | 0.73 (p=0.074)             | 0.641 (p=0.224)            | 0.623 (p=0.906)          |
|                                      | R       | -0.01 (0.03)   | 0.002 (0.04)   | -0.001 (0.019) | 0.539 (p=0.843)            | 0.543 (p=0.683)            | 0.5 (p=1)                |
| Cingulum                             | L       | -0.003 (0.014) | 0.008 (0.035)  | -0.004 (0.033) | 0.718 (p=0.081)            | 0.564 (p=0.552)            | 0.609 (p=0.906)          |
|                                      | R       | -0.003 (0.012) | 0.013 (0.034)  | 0 (0.022)      | 0.737 (p=0.071)            | 0.622 (p=0.29)             | 0.659 (p=0.776)          |
| Body of Corpus Callosum              |         | -0.007 (0.016) | -0.018 (0.052) | -0.013 (0.046) | 0.527 (p=0.93)             | 0.609 (p=0.353)            | 0.586 (p=0.906)          |
| Genu of Corpus Callosum              |         | -0.001 (0.01)  | -0.001 (0.023) | -0.006 (0.017) | 0.514 (p=0.939)            | 0.54 (p=0.701)             | 0.527 (p=0.906)          |
| Splenium of Corpus Callosum          |         | -0.001 (0.009) | -0.004 (0.038) | 0.001 (0.026)  | 0.555 (p=0.748)            | 0.6 (p=0.396)              | 0.545 (p=0.906)          |
| Precentral                           | L       | 0 (0.009)      | 0.019 (0.028)  | 0.013 (0.011)  | 0.715 (p=0.081)            | 0.841 (p=0.001)            | 0.536 (p=0.906)          |
|                                      | R       | 0.003 (0.009)  | 0.022 (0.019)  | 0.017 (0.016)  | 0.828 (p=0.006)            | 0.803 (p=0.003)            | 0.541 (p=0.906)          |
| Postcentral                          | L       | -0.001 (0.01)  | 0.003 (0.019)  | 0.004 (0.014)  | 0.549 (p=0.782)            | 0.579 (p=0.492)            | 0.527 (p=0.906)          |

|                                    |   |                |                |                |                 |                 |                 |
|------------------------------------|---|----------------|----------------|----------------|-----------------|-----------------|-----------------|
|                                    | R | 0 (0.008)      | 0 (0.021)      | 0.007 (0.012)  | 0.514 (p=0.939) | 0.693 (p=0.088) | 0.618 (p=0.906) |
| Corticospinal Tract                | L | -0.001 (0.031) | 0.001 (0.075)  | 0.007 (0.025)  | 0.63 (p=0.315)  | 0.559 (p=0.572) | 0.614 (p=0.906) |
|                                    | R | -0.004 (0.02)  | 0.013 (0.063)  | 0.01 (0.024)   | 0.649 (p=0.246) | 0.669 (p=0.135) | 0.527 (p=0.906) |
| Temporal                           | L | 0.001 (0.005)  | 0.005 (0.01)   | 0.004 (0.005)  | 0.718 (p=0.081) | 0.64 (p=0.224)  | 0.591 (p=0.906) |
|                                    | R | 0.003 (0.006)  | 0.008 (0.01)   | 0.002 (0.006)  | 0.677 (p=0.155) | 0.583 (p=0.492) | 0.709 (p=0.468) |
| Parietal                           | L | 0 (0.005)      | 0.005 (0.007)  | 0.004 (0.007)  | 0.683 (p=0.14)  | 0.693 (p=0.088) | 0.541(p=0.906)  |
|                                    | R | 0 (0.005)      | 0.005 (0.007)  | 0.005 (0.007)  | 0.699 (p=0.105) | 0.688 (p=0.097) | 0.523 (p=0.922) |
| Occipital                          | L | 0 (0.006)      | 0.003 (0.005)  | 0.003 (0.009)  | 0.618 (p=0.358) | 0.579 (p=0.492) | 0.532 (p=0.906) |
|                                    | R | 0.002 (0.004)  | 0.004 (0.007)  | 0.002 (0.005)  | 0.561 (p=0.713) | 0.514 (p=0.88)  | 0.559 (p=0.906) |
| Uncinate Fasciculus                | L | 0.007 (0.024)  | 0.018 (0.046)  | 0.015 (0.023)  | 0.502 (p=1)     | 0.629 (p=0.266) | 0.582 (p=0.906) |
|                                    | R | -0.005 (0.047) | 0.025 (0.041)  | 0.018 (0.028)  | 0.724 (p=0.079) | 0.65 (p=0.196)  | 0.509 (p=0.987) |
| Posterior Thalamic Radiation       | L | 0 (0.011)      | -0.002 (0.034) | -0.001 (0.019) | 0.52 (p=0.939)  | 0.528 (p=0.769) | 0.555 (p=0.906) |
|                                    | R | -0.001 (0.016) | 0.011 (0.028)  | 0 (0.024)      | 0.718 (p=0.081) | 0.56 (p=0.569)  | 0.641 (p=0.895) |
| Superior Cerebellar Peduncle       | L | 0.006 (0.011)  | 0.005 (0.017)  | 0.005 (0.014)  | 0.52 (p=0.939)  | 0.534 (p=0.721) | 0.532 (p=0.906) |
|                                    | R | 0 (0.009)      | 0.003 (0.015)  | 0.004 (0.014)  | 0.574 (p=0.629) | 0.621 (p=0.291) | 0.568 (p=0.906) |
| Anterior Limb of Internal Capsule  | L | 0.003 (0.022)  | 0.029 (0.039)  | 0.018 (0.022)  | 0.693 (p=0.117) | 0.679 (p=0.118) | 0.559 (p=0.906) |
|                                    | R | 0.003 (0.016)  | 0.016 (0.036)  | 0.008 (0.035)  | 0.636 (p=0.291) | 0.622 (p=0.29)  | 0.559 (p=0.906) |
| Posterior Limb of Internal Capsule | L | 0.003 (0.012)  | 0.016 (0.022)  | 0.018 (0.019)  | 0.661 (p=0.206) | 0.736 (p=0.033) | 0.555( p=0.906) |
|                                    | R | -0.002 (0.017) | 0.016 (0.027)  | 0.01 (0.021)   | 0.737 (p=0.071) | 0.733 (p=0.033) | 0.564 (p=0.906) |
| External Capsule                   | L | 0 (0.018)      | 0.027 (0.028)  | 0.014 (0.013)  | 0.828 (p=0.006) | 0.762 (p=0.018) | 0.609 (p=0.906) |
|                                    | R | 0.006 (0.014)  | 0.021 (0.017)  | 0.011 (0.015)  | 0.708 (p=0.09)  | 0.578 (p=0.495) | 0.659 (p=0.776) |

Results are shown as Median (interquartile range). Increase in mean diffusivity over time is represented as positive values. All p values are corrected using the false discovery rate

**Supplementary Table 3: Annualized rates of change in radial diffusivity across regions-of-interest**

| ROI                                  | Hem | Control        | agPPA          | PPAOS          | agPPA~Control   | PPAOS~Control   | agPPA~PPAOS     |
|--------------------------------------|-----|----------------|----------------|----------------|-----------------|-----------------|-----------------|
|                                      |     |                |                |                | AUROC (p)       | AUROC (p)       | AUROC (p)       |
| Inferior Frontal White Matter        | L   | 0.005 (0.012)  | 0.031 (0.029)  | 0.003 (0.019)  | 0.751 (p=0.046) | 0.569 (p=0.529) | 0.791 (p=0.082) |
|                                      | R   | 0.001 (0.01)   | 0.025 (0.021)  | 0.005 (0.009)  | 0.925 (p<0.001) | 0.628 (p=0.267) | 0.855 (p=0.022) |
| Inferior Fronto-occipital Fasciculus | L   | 0.001 (0.014)  | 0.025 (0.029)  | 0.008 (0.013)  | 0.789 (p=0.022) | 0.625 (p=0.277) | 0.691 (p=0.45)  |
|                                      | R   | -0.001 (0.013) | 0.024 (0.043)  | 0.005 (0.018)  | 0.751 (p=0.046) | 0.587 (p=0.424) | 0.641 (p=0.71)  |
| Middle Frontal white matter          | L   | 0.007 (0.013)  | 0.036 (0.025)  | 0.005 (0.013)  | 0.856 (p=0.003) | 0.543 (p=0.728) | 0.877 (p=0.016) |
|                                      | R   | 0.003 (0.011)  | 0.023 (0.017)  | 0.007 (0.011)  | 0.826 (p=0.006) | 0.601 (p=0.351) | 0.795 (p=0.082) |
| Middle Fronto-orbital white matter   | L   | 0.004 (0.022)  | 0.014 (0.039)  | 0.015 (0.02)   | 0.61 (p=0.434)  | 0.619 (p=0.306) | 0.5 (p=1)       |
|                                      | R   | -0.006 (0.021) | 0.006 (0.038)  | -0.002 (0.037) | 0.639 (p=0.305) | 0.635 (p=0.232) | 0.532 (p=0.989) |
| Superior Frontal white matter        | L   | 0.002 (0.009)  | 0.015 (0.023)  | 0.011 (0.012)  | 0.703 (p=0.103) | 0.741 (p=0.032) | 0.523 (p=0.989) |
|                                      | R   | 0 (0.008)      | 0.016 (0.014)  | 0.01 (0.01)    | 0.869 (p=0.002) | 0.775 (p=0.019) | 0.664 (p=0.634) |
| Superior Fronto-occipital Fasciculus | L   | 0.008 (0.03)   | 0.039 (0.03)   | 0.012 (0.017)  | 0.775 (p=0.031) | 0.572 (p=0.528) | 0.777 (p=0.1)   |
|                                      | R   | -0.001 (0.033) | 0.006 (0.062)  | 0.005 (0.035)  | 0.634 (p=0.325) | 0.607 (p=0.338) | 0.577 (p=0.886) |
| Superior Longitudinal Fasciculus     | L   | 0 (0.009)      | 0.015 (0.017)  | 0.01 (0.014)   | 0.743 (p=0.051) | 0.697 (p=0.082) | 0.573 (p=0.886) |
|                                      | R   | -0.001 (0.01)  | 0.015 (0.017)  | 0.002 (0.017)  | 0.794 (p=0.02)  | 0.615 (p=0.306) | 0.695 (p=0.45)  |
| Lateral Fronto-orbital white matter  | L   | 0.003 (0.032)  | 0.033 (0.039)  | 0.014 (0.029)  | 0.714 (p=0.093) | 0.618 (p=0.306) | 0.641 (p=0.71)  |
|                                      | R   | -0.008 (0.031) | -0.001 (0.044) | -0.002 (0.019) | 0.529 (p=0.877) | 0.525 (p=0.812) | 0.514 (p=0.989) |
| Cingulum                             | L   | -0.003 (0.014) | 0.006 (0.034)  | -0.003 (0.035) | 0.703 (p=0.103) | 0.568 (p=0.53)  | 0.586 (p=0.886) |
|                                      | R   | -0.003 (0.012) | 0.013 (0.031)  | 0.002 (0.023)  | 0.759 (p=0.041) | 0.638 (p=0.224) | 0.595 (p=0.886) |
| Body of Corpus Callosum              |     | -0.004 (0.017) | -0.018 (0.051) | -0.012 (0.05)  | 0.513 (p=0.94)  | 0.599 (p=0.354) | 0.609 (p=0.886) |
| Genu of Corpus Callosum              |     | -0.001 (0.009) | -0.001 (0.019) | -0.005 (0.017) | 0.505 (p=0.969) | 0.513 (p=0.896) | 0.518 (p=0.989) |
| Splenium of Corpus Callosum          |     | -0.003 (0.008) | -0.004 (0.039) | 0.004 (0.017)  | 0.61 (p=0.434)  | 0.666 (p=0.161) | 0.523 (p=0.989) |
| Precentral                           | L   | -0.001 (0.009) | 0.016 (0.026)  | 0.003 (0.015)  | 0.725 (p=0.078) | 0.649 (p=0.204) | 0.595 (p=0.886) |
|                                      | R   | 0.002 (0.008)  | 0.018 (0.019)  | 0.001 (0.028)  | 0.773 (p=0.031) | 0.615 (p=0.306) | 0.673 (p=0.584) |
| Postcentral                          | L   | -0.002 (0.009) | 0.001 (0.02)   | 0.002 (0.013)  | 0.532 (p=0.872) | 0.599 (p=0.354) | 0.541 (p=0.989) |
|                                      | R   | -0.003 (0.012) | 0 (0.021)      | 0.012 (0.015)  | 0.516 (p=0.94)  | 0.769 (p=0.019) | 0.709 (p=0.377) |
| Corticospinal Tract                  | L   | 0.005 (0.02)   | 0.007 (0.041)  | 0.006 (0.025)  | 0.545 (p=0.865) | 0.551 (p=0.669) | 0.536 (p=0.989) |
|                                      | R   | 0 (0.015)      | 0.011 (0.02)   | 0.011 (0.026)  | 0.703 (p=0.103) | 0.65 (p=0.204)  | 0.514 (p=0.989) |
| Temporal                             | L   | 0.002 (0.005)  | 0.003 (0.01)   | 0.01 (0.015)   | 0.615 (p=0.421) | 0.666 (p=0.161) | 0.591 (p=0.886) |

|                                    |   |                |                |                |                 |                 |                 |
|------------------------------------|---|----------------|----------------|----------------|-----------------|-----------------|-----------------|
|                                    | R | 0.002 (0.005)  | 0.007 (0.01)   | 0.004 (0.018)  | 0.65 (p=0.266)  | 0.532 (p=0.785) | 0.623 (p=0.836) |
| Parietal                           | L | -0.001 (0.004) | 0.004 (0.008)  | 0 (0.025)      | 0.682 (p=0.157) | 0.643 (p=0.224) | 0.532 (p=0.989) |
|                                    | R | 0 (0.006)      | 0.004 (0.007)  | -0.006 (0.028) | 0.679 (p=0.161) | 0.571 (p=0.528) | 0.573 (p=0.886) |
| Occipital                          | L | 0 (0.007)      | 0.001 (0.004)  | 0.004 (0.007)  | 0.54 (p=0.872)  | 0.665 (p=0.161) | 0.641 (p=0.71)  |
|                                    | R | 0.003 (0.007)  | 0.003 (0.006)  | 0.003 (0.006)  | 0.543 (p=0.87)  | 0.538 (p=0.742) | 0.509 (p=1)     |
| Uncinate Fasciculus                | L | 0.01 (0.027)   | 0.018 (0.048)  | 0.016 (0.025)  | 0.508 (p=0.965) | 0.623 (p=0.351) | 0.553 (p=0.989) |
|                                    | R | -0.006 (0.039) | 0.025 (0.042)  | 0.023 (0.031)  | 0.652 (p=0.261) | 0.684 (p=0.196) | 0.508 (p=1)     |
| Posterior Thalamic Radiation       | L | 0 (0.009)      | -0.007 (0.033) | -0.002 (0.023) | 0.535 (p=0.872) | 0.549 (p=0.684) | 0.527 (p=0.989) |
|                                    | R | 0 (0.012)      | 0.007 (0.024)  | 0.006 (0.012)  | 0.706 (p=0.103) | 0.638 (p=0.224) | 0.591 (p=0.886) |
| Superior Cerebellar Peduncle       | L | 0.006 (0.012)  | 0.005 (0.01)   | 0.009 (0.019)  | 0.513 (p=0.94)  | 0.509 (p=0.922) | 0.541 (p=0.989) |
|                                    | R | 0.002 (0.009)  | 0.003 (0.014)  | 0.005 (0.015)  | 0.548 (p=0.865) | 0.54 (p=0.742)  | 0.523 (p=0.989) |
| Anterior Limb of Internal Capsule  | L | 0.003 (0.017)  | 0.022 (0.034)  | 0.014 (0.017)  | 0.687 (p=0.144) | 0.682 (p=0.124) | 0.605 (p=0.886) |
|                                    | R | 0.005 (0.013)  | 0.007 (0.036)  | 0.006 (0.033)  | 0.532 (p=0.872) | 0.531 (p=0.785) | 0.514 (p=0.989) |
| Posterior Limb of Internal Capsule | L | 0.001 (0.013)  | 0.015 (0.02)   | 0.012 (0.015)  | 0.746 (p=0.05)  | 0.71 (p=0.062)  | 0.586 (p=0.886) |
|                                    | R | -0.002 (0.013) | 0.009 (0.021)  | 0.007 (0.021)  | 0.644 (p=0.285) | 0.699 (p=0.082) | 0.55 (p=0.989)  |
| External Capsule                   | L | 0.005 (0.017)  | 0.027 (0.027)  | 0.016 (0.015)  | 0.77 (p=0.031)  | 0.725 (p=0.04)  | 0.582 (p=0.886) |
|                                    | R | 0.006 (0.015)  | 0.02 (0.016)   | 0.013 (0.016)  | 0.741 (p=0.052) | 0.638 (p=0.224) | 0.609 (p=0.886) |

Results are shown as Median (interquartile range). Increase in radial diffusivity is represented with positive values. All p values are corrected using the false discovery rate

**Supplementary Table 4: Annualized rates of change in axial diffusivity across regions-of-interest**

| ROI                                  | Hem | Control        | agPPA          | PPAOS          | agPPA~Control   | PPAOS~Control   | agPPA~PPAOS     |
|--------------------------------------|-----|----------------|----------------|----------------|-----------------|-----------------|-----------------|
|                                      |     |                |                |                | AUROC (p)       | AUROC (p)       | AUROC (p)       |
| Inferior Frontal White Matter        | L   | 0.005 (0.015)  | 0.031 (0.031)  | 0.011 (0.018)  | 0.761 (p=0.041) | 0.619 (p=0.251) | 0.689 (p=0.7)   |
|                                      | R   | 0 (0.012)      | 0.027 (0.022)  | 0.011 (0.013)  | 0.892 (p=0.005) | 0.725 (p=0.022) | 0.706 (p=0.7)   |
| Inferior Fronto-occipital Fasciculus | L   | 0.004 (0.019)  | 0.028 (0.031)  | 0.012 (0.014)  | 0.719 (p=0.09)  | 0.666 (p=0.108) | 0.622 (p=0.814) |
|                                      | R   | -0.001 (0.015) | 0.028 (0.035)  | 0.009 (0.014)  | 0.81 (p=0.024)  | 0.71 (p=0.03)   | 0.65 (p=0.752)  |
| Middle Frontal white matter          | L   | 0.004 (0.013)  | 0.033 (0.022)  | 0.018 (0.018)  | 0.863 (p=0.008) | 0.743 (p=0.013) | 0.7 (p=0.7)     |
|                                      | R   | 0.003 (0.011)  | 0.026 (0.029)  | 0.019 (0.014)  | 0.732 (p=0.077) | 0.838 (p<0.001) | 0.589 (p=0.927) |
| Middle Fronto-orbital white matter   | L   | 0.003 (0.02)   | 0.013 (0.044)  | 0.009 (0.016)  | 0.634 (p=0.334) | 0.591 (p=0.418) | 0.544 (p=0.999) |
|                                      | R   | -0.002 (0.021) | 0.011 (0.047)  | -0.011 (0.049) | 0.637 (p=0.334) | 0.557 (p=0.617) | 0.561 (p=0.999) |
| Superior Frontal white matter        | L   | 0 (0.014)      | 0.021 (0.023)  | 0.013 (0.016)  | 0.801 (p=0.029) | 0.75 (p=0.011)  | 0.633 (p=0.752) |
|                                      | R   | 0.002 (0.012)  | 0.02 (0.018)   | 0.014 (0.013)  | 0.824 (p=0.019) | 0.771 (p=0.007) | 0.639 (p=0.752) |
| Superior Fronto-occipital Fasciculus | L   | 0.012 (0.035)  | 0.036 (0.041)  | 0.027 (0.024)  | 0.657 (p=0.265) | 0.66 (p=0.118)  | 0.522 (p=0.999) |
|                                      | R   | 0.011 (0.03)   | 0.012 (0.052)  | 0.014 (0.042)  | 0.588 (p=0.521) | 0.56 (p=0.603)  | 0.539 (p=0.999) |
| Superior Longitudinal Fasciculus     | L   | -0.001 (0.012) | 0.018 (0.02)   | 0.019 (0.019)  | 0.788 (p=0.031) | 0.806 (p=0.002) | 0.5 (p=1)       |
|                                      | R   | 0 (0.01)       | 0.017 (0.015)  | 0.016 (0.017)  | 0.788 (p=0.031) | 0.762 (p=0.007) | 0.517 (p=0.999) |
| Lateral Fronto-orbital white matter  | L   | 0.009 (0.027)  | 0.021 (0.032)  | 0.016 (0.024)  | 0.598 (p=0.481) | 0.593 (p=0.417) | 0.511 (p=0.999) |
|                                      | R   | -0.009 (0.037) | 0.003 (0.048)  | -0.004 (0.02)  | 0.565 (p=0.649) | 0.531 (p=0.787) | 0.572 (p=0.967) |
| Cingulum                             | L   | -0.001 (0.017) | 0.008 (0.037)  | -0.008 (0.032) | 0.686 (p=0.163) | 0.534 (p=0.774) | 0.683 (p=0.7)   |
|                                      | R   | 0 (0.014)      | 0.005 (0.023)  | -0.004 (0.021) | 0.614 (p=0.425) | 0.509 (p=0.939) | 0.639 (p=0.752) |
| Body of Corpus Callosum              |     | -0.004 (0.015) | -0.024 (0.053) | -0.018 (0.044) | 0.611 (p=0.434) | 0.512 (p=0.928) | 0.567 (p=0.99)  |
| Genu of Corpus Callosum              |     | 0.001 (0.011)  | -0.01 (0.024)  | -0.004 (0.016) | 0.621 (p=0.397) | 0.574 (p=0.508) | 0.578 (p=0.967) |
| Splenium of Corpus Callosum          |     | -0.001 (0.009) | -0.002 (0.04)  | -0.002 (0.028) | 0.647 (p=0.294) | 0.575 (p=0.507) | 0.589 (p=0.927) |
| Precentral                           | L   | -0.001 (0.01)  | 0.025 (0.033)  | 0.019 (0.013)  | 0.768 (p=0.039) | 0.887 (p<0.001) | 0.528 (p=0.999) |
|                                      | R   | 0.002 (0.012)  | 0.025 (0.024)  | 0.023 (0.017)  | 0.797 (p=0.029) | 0.875 (p<0.001) | 0.511 (p=0.999) |
| Postcentral                          | L   | 0.001 (0.013)  | 0.007 (0.021)  | 0.005 (0.014)  | 0.601 (p=0.472) | 0.585 (p=0.455) | 0.511 (p=0.999) |
|                                      | R   | -0.001 (0.013) | 0.008 (0.022)  | 0.009 (0.015)  | 0.562 (p=0.659) | 0.719 (p=0.024) | 0.528 (p=0.999) |
| Corticospinal Tract                  | L   | 0.004 (0.019)  | 0.04 (0.023)   | 0.012 (0.022)  | 0.882 (p=0.005) | 0.625 (p=0.248) | 0.811 (p=0.388) |
|                                      | R   | 0.004 (0.015)  | 0.029 (0.022)  | 0.009 (0.026)  | 0.837 (p=0.015) | 0.504 (p=0.965) | 0.739 (p=0.7)   |
| Temporal                             | L   | 0.002 (0.005)  | 0.002 (0.009)  | 0.005 (0.006)  | 0.552 (p=0.7)   | 0.625 (p=0.248) | 0.556 (p=0.999) |

|                                    |   |                |               |               |                 |                 |                 |
|------------------------------------|---|----------------|---------------|---------------|-----------------|-----------------|-----------------|
|                                    | R | 0.003 (0.005)  | 0.008 (0.008) | 0.004 (0.006) | 0.699 (p=0.129) | 0.546 (p=0.718) | 0.661 (p=0.752) |
| Parietal                           | L | 0 (0.005)      | 0.007 (0.008) | 0.007 (0.009) | 0.775 (p=0.037) | 0.76 (p=0.007)  | 0.533 (p=0.999) |
|                                    | R | 0 (0.006)      | 0.008 (0.007) | 0.008 (0.009) | 0.82 (p=0.019)  | 0.766 (p=0.007) | 0.55 (p=0.999)  |
| Occipital                          | L | 0.001 (0.007)  | 0.002 (0.005) | 0.005 (0.01)  | 0.575 (p=0.595) | 0.671 (p=0.099) | 0.617 (p=0.814) |
|                                    | R | 0.004 (0.009)  | 0.002 (0.007) | 0.004 (0.005) | 0.503 (p=0.988) | 0.56 (p=0.603)  | 0.617 (p=0.814) |
| Uncinate Fasciculus                | L | 0.002 (0.032)  | 0.015 (0.025) | 0.021 (0.027) | 0.634 (p=0.334) | 0.722 (p=0.023) | 0.639 (p=0.752) |
|                                    | R | -0.007 (0.039) | 0.025 (0.027) | 0.022 (0.034) | 0.765 (p=0.039) | 0.728 (p=0.021) | 0.506 (p=1)     |
| Posterior Thalamic Radiation       | L | 0.003 (0.013)  | 0.001 (0.038) | 0.007 (0.019) | 0.601 (p=0.472) | 0.579 (p=0.494) | 0.517 (p=0.999) |
|                                    | R | 0.001 (0.018)  | 0.01 (0.027)  | 0.008 (0.026) | 0.68 (p=0.18)   | 0.649 (p=0.151) | 0.533 (p=0.999) |
| Superior Cerebellar Peduncle       | L | 0.004 (0.012)  | 0.007 (0.01)  | 0.007 (0.017) | 0.592 (p=0.511) | 0.528 (p=0.801) | 0.539 (p=0.999) |
|                                    | R | 0.004 (0.012)  | 0 (0.016)     | 0.006 (0.014) | 0.542 (p=0.755) | 0.575 (p=0.507) | 0.583 (p=0.951) |
| Anterior Limb of Internal Capsule  | L | 0.005 (0.013)  | 0.032 (0.035) | 0.014 (0.024) | 0.719 (p=0.09)  | 0.613 (p=0.278) | 0.661 (p=0.752) |
|                                    | R | 0.008 (0.014)  | 0.01 (0.027)  | 0.01 (0.033)  | 0.533 (p=0.795) | 0.537 (p=0.76)  | 0.5 (p=1)       |
| Posterior Limb of Internal Capsule | L | 0.008 (0.016)  | 0.024 (0.02)  | 0.019 (0.017) | 0.745 (p=0.061) | 0.693 (p=0.051) | 0.55 (p=0.999)  |
|                                    | R | 0.001 (0.019)  | 0.024 (0.022) | 0.009 (0.023) | 0.781 (p=0.033) | 0.621 (p=0.25)  | 0.689 (p=0.7)   |
| External Capsule                   | L | 0.004 (0.016)  | 0.021 (0.021) | 0.018 (0.017) | 0.725 (p=0.087) | 0.732 (p=0.019) | 0.572 (p=0.967) |
|                                    | R | 0.005 (0.014)  | 0.024 (0.02)  | 0.016 (0.02)  | 0.765 (p=0.039) | 0.662 (p=0.118) | 0.633 (p=0.752) |

Results are shown as Median (interquartile range). Increase in axial diffusivity is represented with positive values. All p values are corrected using the false discovery rate
