# Supplementary material
Source: PubMed Central journal article supplement (PMC5837339)

**Supplementary Figure 1:** Longitudinal neuroimaging correlations with WAB-AQ within the agPPA subjects only. Results are shown at a lenient statistical threshold of  $p < 0.01$ , uncorrected, with an extent threshold of 200, in order to illustrate the topographic similarity with the results obtained across the whole cohort of agPPA and PPAOS subjects (Figure 4).

Structural MRI atrophy

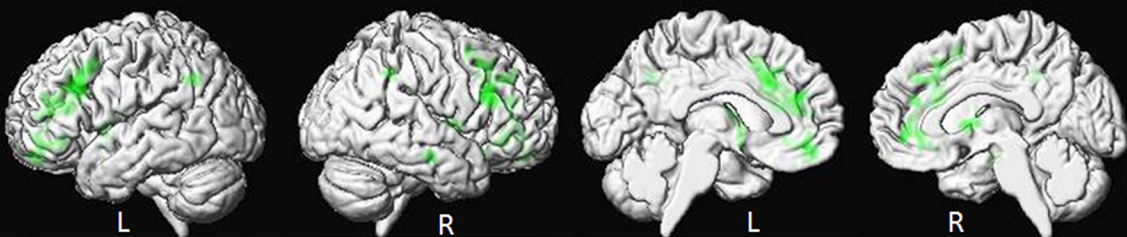

FDG-PET metabolism

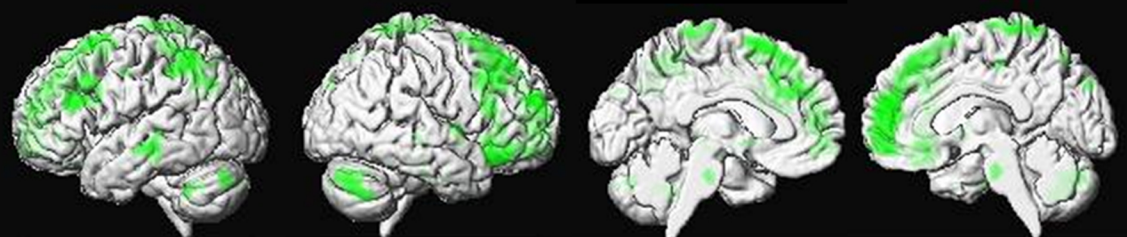

FA

MD

RD

AxD

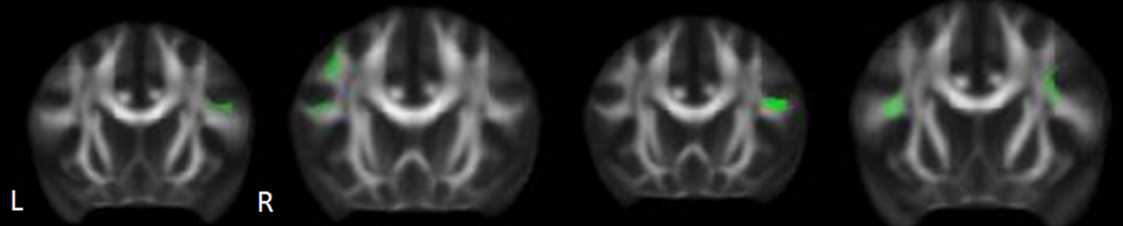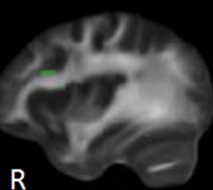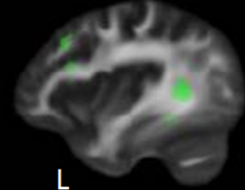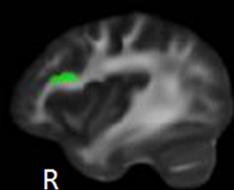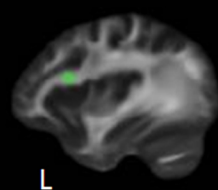

Supplement: brain-2016-01452-file011_awx293.pdf [file brain-2016-01452-file011_awx293.pdf]
